# Supplementary material
Source: PubMed Central journal article supplement (PMC2756357)
Supplement: mmc1.pdf [file mmc1.pdf]

Biophysical Journal, Volume 97

**Supporting Material**

**Detergent-like activity and  $\alpha$ -helical structure of warnericin RK, an anti-*Legionella* peptide**

Julien Verdon, Mirjam Falge, Elke Maier, Heike Bruhn, Michael Steinert, Cornelius Faber, Roland Benz, and Yann Héchard

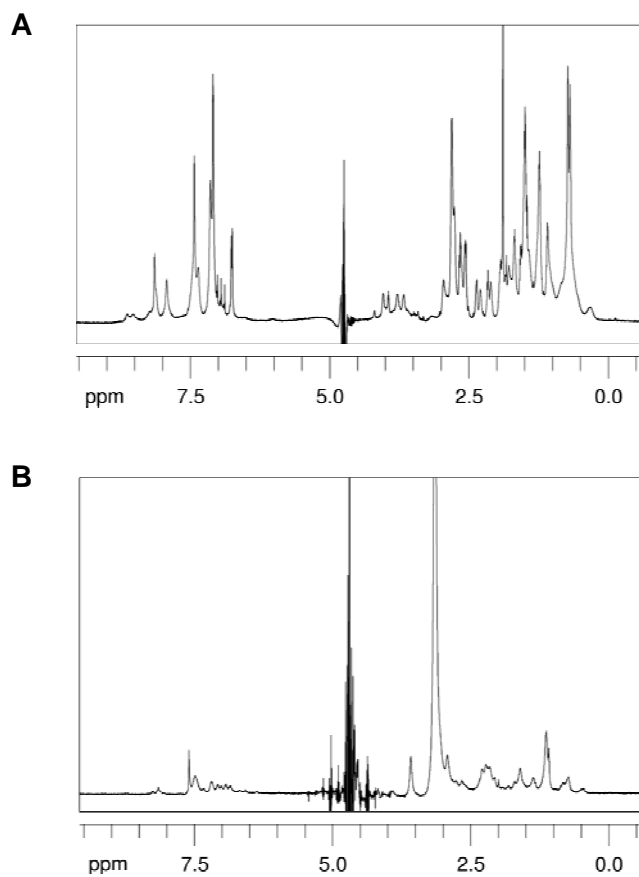

SUPPLEMENTARY FIGURE 1 D NMR spectra of warnericin RK. (A) 1.3 mM warnericin RK in sodium phosphate buffer, pH 5.6. (B) 1.4 mM warnericin RK in presence of 13.6 mM DMPC.
